# Supplementary material
Source: HighWire-hosted journal article supplement (https://bjsm.bmj.com/content/58/14/792)
Supplement: inline-supplementary-material-2 [file inline-supplementary-material-2.pdf]

**Table 1.** Search strategy

|                                                                                                                                                                                                                                                                   |
|-------------------------------------------------------------------------------------------------------------------------------------------------------------------------------------------------------------------------------------------------------------------|
| <b>PubMed (including MEDLINE)</b>                                                                                                                                                                                                                                 |
| 1. “Patellofemoral pain syndrome” [Mesh] OR “Patellofemoral Pain” OR “Anterior Knee Pain” OR “Patellofemoral Dysfunction”                                                                                                                                         |
| 2. “Exercise Therapy”[Mesh] OR “Exercise”[Mesh] OR “Resistance Training”[Mesh] OR “Kinesiotherapy” OR “Physical Therapy Modalities”[Mesh] OR “exercise intervention” OR “therapeutic exercise” OR “exercise therapeutic” OR “physical therapy” OR “physiotherapy” |
| 3. 1 AND 2                                                                                                                                                                                                                                                        |
| <b>Embase (via Elsevier)</b>                                                                                                                                                                                                                                      |
| 1. ‘Patellofemoral pain syndrome’ OR ‘Patellofemoral Syndrome’ OR ‘Anterior Knee Pain Syndrome’ ‘Patellofemoral Pain’ OR ‘Anterior Knee Pain’ OR ‘Patellofemoral Dysfunction’                                                                                     |
| 2. ‘Exercise Therapy’ OR Exercise OR ‘Resistance Training’ OR ‘Strength Training’ OR Kinesiotherapy OR ‘Physical therapy’ ORphysiotherapy OR ‘exercise intervention’ OR ‘therapeutic exercise’ OR ‘exercise therapeutic’ OR ‘physical therapy modalities’         |
| 3. 1 AND 2                                                                                                                                                                                                                                                        |
| <b>Cochrane Central Register of Controlled Trials (CENTRAL)</b>                                                                                                                                                                                                   |
| 1. patellofemoral pain OR MeSH descriptor: [Patellofemoral Pain Syndrome] explode all trees OR anterior knee pain OR patellofemoral dysfunction                                                                                                                   |
| 2. MeSH descriptor: [Exercise Therapy] explode all trees OR MeSH descriptor: [Exercise] explode all trees OR MeSH descriptor: [ResistanceTraining] explode all trees OR Kinesiotherapy OR MeSH descriptor: [Physical Therapy Modalities] explode all trees OR     |

---

exercise interventionOR therapeutic exercise OR exercise therapeutic

3. 1 AND 2

---

**PEDro**

- 1. **Abstract & Title:** Patellofemoral pain; **Body Part:** lower leg or knee; **Method:** clinical trial.
- 2. **Abstract & Title:** Patellofemoral pain syndrome; **Body Part:** lower leg or knee; **Method:** clinical trial.
- 3. **Abstract & Title:** Patellofemoral syndrome; **Body Part:** lower leg or knee; **Method:** clinical trial.
- 4. **Abstract & Title:** Anterior knee pain syndrome; **Body Part:** lower leg or knee; **Method:** clinical trial.
- 5. **Abstract & Title:** Anterior knee pain; **Body Part:** lower leg or knee; **Method:** clinical trial.
- 6. **Abstract & Title:** Patellofemoral dysfunction; **Body Part:** lower leg or knee; **Method:** clinical trial.

---

**SPORTDiscus (via EBSCO)**

- 1. patellofemoral pain syndrome OR patellofemoral syndrome OR anterior knee pain syndrome OR patellofemoral pain OR anterior knee painOR patellofemoral dysfunction
- 2. exercise therapy OR exercise OR resistance training OR strength training OR kinesiotherapy OR physical therapy OR physiotherapy ORexercise intervention OR therapeutic exercise OR exercise therapeutic OR physical therapy modalities
- 3. 1 AND 2

---

**CINAHL (via EBSCO)**

- 1. patellofemoral pain syndrome OR patellofemoral syndrome OR anterior knee pain syndrome OR patellofemoral pain OR anterior
-

- 
- knee painOR patellofemoral dysfunction
  - 2. exercise therapy OR exercise OR resistance training OR strength training OR kinesiotherapy OR physical therapy OR physiotherapy ORexercise intervention OR therapeutic exercise OR exercise therapeutic OR physical therapy modalities
  - 3. 1 AND 2
- 

**Web of Science (via Clarivate Analytics)**

- 1. TI=(Patellofemoral pain syndrome OR Patellofemoral Syndrome OR Anterior Knee Pain Syndrome Patellofemoral Pain OR Anterior KneePain OR Patellofemoral Dysfunction)
  - 2. AB=(Patellofemoral pain syndrome OR Patellofemoral Syndrome OR Anterior Knee Pain Syndrome Patellofemoral Pain OR Anterior KneePain OR Patellofemoral Dysfunction)
  - 3. TI=(Exercise Therapy OR Exercise OR Resistance Training OR Strength Training OR Kinesiotherapy OR Physical therapy OR physiotherapyOR exercise intervention OR therapeutic exercise OR exercise therapeutic OR physical therapy modalities)
  - 4. AB=(Exercise Therapy OR Exercise OR Resistance Training OR Strength Training OR Kinesiotherapy OR Physical therapy ORphysiotherapy OR exercise intervention OR therapeutic exercise OR exercise therapeutic OR physical therapy modalities)
  - 5. 1 OR 2
  - 6. 3 OR 4
  - 7. 5 AND 6
- 

*Abbreviations: MeSH, Medical Subject Headings.*
