# Supplementary material
Source: HighWire-hosted journal article supplement (https://bjsm.bmj.com/content/58/14/792)
Supplement: inline-supplementary-material-3 [file inline-supplementary-material-3.pdf]

**Table 1.** Trials where authors were contacted for data

| <b>Trial<br/>Year, author</b> | <b>Date of initial<br/>correspondence</b> | <b>Date data received</b>          | <b>Data requested from<br/>authors</b>                                                                                            |
|-------------------------------|-------------------------------------------|------------------------------------|-----------------------------------------------------------------------------------------------------------------------------------|
| Şahan et al.[1] 2023          | December 4 <sup>th</sup> 2023             | December 4 <sup>th</sup> 2023      | <i>Data requested:</i> means and standard deviations from pain and function outcomes                                              |
| Songur et al.[2] 2023         | December 5 <sup>th</sup> 2023             | December 16 <sup>th</sup> 2023     | <i>Data requested:</i> means and standard deviations from pain and function outcomes and for the participant's age for each group |
| Anwar et al.[3] 2022          | December 17 <sup>th</sup> 2023            |                                    | <i>Data requested:</i> standard deviations from pain and function outcomes                                                        |
| Constantinou[4] et al. 2022   | December 7 <sup>th</sup> 2023             |                                    | <i>Data requested:</i> means and standard deviations from pain and function outcomes                                              |
| Wu[5] et al. 2022             | December 16 <sup>th</sup> 2023            |                                    | <i>Data requested:</i> standard deviations from pain and function outcomes                                                        |
| Rodrigues et al.[6] 2022      | January 19 <sup>th</sup> 2022             | January 21 <sup>st</sup> 2022      | <i>Data requested:</i> standard deviations from pain outcomes                                                                     |
| Glaviano et al.[7] 2019       | December 16 <sup>th</sup> 2023            | January 22 <sup>nd</sup> 2022      | <i>Data requested:</i> means and standard deviations from pain and function outcomes                                              |
| Günay et al.[8] 2017          | August 25 <sup>th</sup> 2023              | August 25 <sup>th</sup> 2023       | <i>Data requested:</i> means and standard deviations from pain and function outcomes                                              |
| Iammarrone et al.[9] 2016     | July 7 <sup>th</sup> 2023                 |                                    | <i>Data requested:</i> means and standard deviations from pain outcome                                                            |
| Petersen et al.[10] 2016      | December 6 <sup>th</sup> 2023             |                                    | <i>Data requested:</i> means and standard deviations from pain and function outcomes                                              |
| Mousavi et al.[11] 2011       | July 7 <sup>th</sup> 2023                 |                                    | <i>Data requested:</i> means and standard deviations from pain and function outcomes                                              |
| Bily et al.[12] 2008          | July 7 <sup>th</sup> 2023                 | July 20 <sup>th</sup> 2023         | <i>Data requested:</i> means and standard deviations from pain and function outcomes                                              |
| Denton et al.[13] 2005        | December 6 <sup>th</sup> 2023             | Extracted using Web Plot Digitizer | <i>Data requested:</i> means and standard deviations from pain and function outcomes                                              |

## References

- 1 Şahan TY, Vergili Ö, Oktaş B. Investigation of new application technique named star taping in patellofemoral pain: a randomized, single-blind, and placebo-controlled study. *Somatosens Mot Res.* 2023;1–8.
- 2 Songur A, Demirdel E, Kılıc O, *et al.* The effects of different taping methods on patellofemoral alignment, pain and function in individuals with patellofemoral pain: A randomized controlled trial. *PM R.* Published Online First: 29 August 2023. doi: 10.1002/pmrj.13067
- 3 Anwar S, Javaid M, Malik S, *et al.* Effects of mulligan pain release phenomenon technique in management of patellofemoral pain syndrome: RCT. *Pak J Med Health Sci.* 2022;16:72–72. doi: 10.53350/pjmhs2216372
- 4 Constantinou A, Mamais I, Papathanasiou G, *et al.* Comparing hip and knee focused exercises versus hip and knee focused exercises with the use of blood flow restriction training in adults with patellofemoral pain. *Eur J Phys Rehabil Med.* 2022;58:225–35.
- 5 Wu Z, Zou Z, Zhong J, *et al.* Effects of whole-body vibration plus hip-knee muscle strengthening training on adult patellofemoral pain syndrome: a randomized controlled trial. *Disabil Rehabil.* 2022;44:6017–25.
- 6 Rodrigues GM, Paixão A, Arruda T, *et al.* Anodal transcranial direct current stimulation increases muscular strength and reduces pain perception in women with patellofemoral pain. *J Strength Cond Res.* 2022;36:371–8.
- 7 Glaviano NR, Marshall AN, Mangum LC, *et al.* Impairment-based rehabilitation with patterned electrical neuromuscular stimulation and lower extremity function in individuals with patellofemoral pain: a preliminary study. *J Athl Train.* 2019;54:255–69.

- 8 Günay E, Sarıkaya S, Özdolap Ş, *et al.* Effectiveness of the kinesiотaping in the patellofemoral pain syndrome. *Turk J Phys Med Rehabil.* 2017;63:299–306.
- 9 Iammarrone CS, Cadossi M, Sambri A, *et al.* Is there a role of pulsed electromagnetic fields in management of patellofemoral pain syndrome? Randomized controlled study at one year follow-up. *Bioelectromagnetics.* 2016;37:81–8.
- 10 Petersen W, Ellermann A, Rembitzki IV, *et al.* Evaluating the potential synergistic benefit of a realignment brace on patients receiving exercise therapy for patellofemoral pain syndrome: a randomized clinical trial. *Arch Orthop Trauma Surg.* 2016;136:975–82.
- 11 Mousavi SM, Khayambashi K, Nejadian SL, *et al.* The Effects of Kinesiotape and Strength Training on Knee Pain and Quadriceps Strength in People with Patellofemoral Pain Syndrome (PFPS). *J Isfahan Med Sch.* 2011;29:1657–68.
- 12 Bily W, Trimmel L, Mödlin M, *et al.* Training program and additional electric muscle stimulation for patellofemoral pain syndrome: a pilot study. *Arch Phys Med Rehabil.* 2008;89:1230–6.
- 13 Denton J, Willson JD, Ballantyne BT, *et al.* The addition of the Protonics brace system to a rehabilitation protocol to address patellofemoral joint syndrome. *J Orthop Sports Phys Ther.* 2005;35:210–9.
