# Supplementary material
Source: HighWire-hosted journal article supplement (https://bjsm.bmj.com/content/58/14/792)
Supplement: inline-supplementary-material-6 [file inline-supplementary-material-6.pdf]

| <b>Table 1. Reasons for not pooling the trials data</b> |                                                                                                                                                                                     |
|---------------------------------------------------------|-------------------------------------------------------------------------------------------------------------------------------------------------------------------------------------|
| <b>Trial<br/>Year, author</b>                           | <b>Reasons for not pooling data</b>                                                                                                                                                 |
| Anwar et al.[1] 2022                                    | This study is the only one that evaluated pain release phenomenon technique as adjunct treatment                                                                                    |
| Basbug et al.[2] 2022                                   | This study applied Kinesio taping in the foot                                                                                                                                       |
| Constantinou et al.[3] 2022                             | This study is the only one that compared blood flow restriction combined to exercise therapy to exercise therapy alone                                                              |
| Qayyum et al.[4] 2022                                   | This study is the only one that compared higher power laser combined to exercise therapy to exercise therapy alone                                                                  |
| Rodrigues et al.[5] 2022                                | This study is the only one that evaluated anodal transcranial direct current stimulation as adjunct treatment                                                                       |
| Aghakeshizadeh et al.[6] 2021                           | This study is the only one that evaluated internal and external focus as adjunct treatment                                                                                          |
| Bagheri et al.[7] 2021                                  | This study is the only one that evaluated mindfulness as adjunct treatment                                                                                                          |
| Fatimah et al.[8] 2021                                  | This study is the only one that evaluated tibiofemoral mobilisation as adjunct treatment                                                                                            |
| Ma et al.[9] 2020                                       | This study is the only one that compared dry needling combined to exercise therapy to sham dry needling combined to exercise therapy including patients from the general population |
| Zarei et al.[10] 2020                                   | This study is the only one that compared dry needling combined to exercise therapy to exercise therapy alone                                                                        |
| Glaviano et al.[11] 2019                                | This study is the only one that evaluated patterned electrical neuromuscular stimulation as adjunct treatment                                                                       |
| Nouri et al.[12] 2019                                   | This study is the only one that compared higher power laser combined to exercise therapy to sham laser combined to exercise therapy                                                 |
| Sutlive et al.[13] 2018                                 | This study is the only one that compared dry needling combined to exercise                                                                                                          |

|                             |                                                                                                                                                          |
|-----------------------------|----------------------------------------------------------------------------------------------------------------------------------------------------------|
|                             | therapy to sham dry needling combined to exercise therapy including arm recruits                                                                         |
| Giles et al.[14] 2017       | This study is the only one that compared blood flow restriction combined to exercise therapy to sham blood flow restriction combined to exercise therapy |
| Iammarrone et al.[15] 2016  | This study is the only one that evaluated pulsed electromagnetic fields as adjunct treatment                                                             |
| Petersen et al.[16] 2016    | We do not have the mean and standard deviation values for pooling its data                                                                               |
| Telles et al.[17] 2016      | This study is the only one that evaluated myofascial technique as adjunct treatment                                                                      |
| Mousavi et al.[18] 2011     | We do not have the mean and standard deviation values for pooling its data                                                                               |
| Whittingham et al.[19] 2004 | The data pooling for the specified time frame in this study has not been estimated.                                                                      |
| Eng et al.[20] 1993         | This study is the only one that evaluated foot orthoses as adjunct treatment                                                                             |

## References

- 1 Anwar S, Javaid M, Malik S, *et al.* Effects of mulligan pain release phenomenon technique in management of patellofemoral pain syndrome: RCT. *Pak J Med Health Sci.* 2022;16:72–72. doi: 10.53350/pjmhs2216372.
- 2 Basbug P, Kilic RT, Atay AO, *et al.* The effects of progressive neuromuscular exercise program and taping on muscle strength and pain in patellofemoral pain. A randomized controlled blind study. *Somatosens Mot Res.* 2022;39:39–45.
- 3 Constantinou A, Mamais I, Papathanasiou G, *et al.* Comparing hip and knee focused exercises versus hip and knee focused exercises with the use of blood flow restriction training in adults with patellofemoral pain. *Eur J Phys Rehabil Med.* 2022;58:225–35.
- 4 Qayyum HA, Arsalan SA, Tanveer F, *et al.* Role of high power laser therapy on pain reduction in patients with patellofemoral pain syndrome. *Pak J Med Health Sci.* 2022;16:9–12.

- 5 Rodrigues GM, Paixão A, Arruda T, *et al.* Anodal transcranial direct current stimulation increases muscular strength and reduces pain perception in women with patellofemoral pain. *J Strength Cond Res.* 2022;36:371–8.
- 6 Aghakeshizadeh F, Letafatkar A, Thomas AC. Internal and external focus show similar effect on the gait kinematics in patients with patellofemoral pain: A randomised controlled trial. *Gait Posture.* 2021;84:155–61.
- 7 Bagheri S, Naderi A, Mirali S, *et al.* Adding mindfulness practice to exercise therapy for female recreational runners with patellofemoral pain: a randomized controlled trial. *J Athl Train.* 2021;56:902–11.
- 8 Fatimah I, Waqqar S. Effects of tibiofemoral mobilization in patients of Patellofemoral pain syndrome. *JPMMA J Pak Med Assoc.* 2021;71:2506–10.
- 9 Ma Y-T, Li L-H, Han Q, *et al.* Effects of trigger point dry needling on neuromuscular performance and pain of individuals affected by patellofemoral pain: a randomized controlled trial. *J Pain Res.* 2020;13:1677–86.
- 10 Zarei H, Bervis S, Piroozi S, *et al.* Added value of gluteus medius and quadratus lumborum dry needling in improving knee pain and function in female athletes with patellofemoral pain syndrome: a randomized clinical trial. *Arch Phys Med Rehabil.* 2020;101:265–74.
- 11 Glaviano NR, Marshall AN, Mangum LC, *et al.* Impairment-based rehabilitation with patterned electrical neuromuscular stimulation and lower extremity function in individuals with patellofemoral pain: a preliminary study. *J Athl Train.* 2019;54:255–69.
- 12 Nouri F, Raeissadat SA, Eliaspour D, *et al.* Efficacy of high-power laser in alleviating pain and improving function of patients with patellofemoral pain syndrome: a single-blind randomized controlled trial. *J Lasers Med Sci.* 2019;10:37–43.
- 13 Sutlive TG, Golden A, King K, *et al.* Short-term effects of trigger point dry needling on pain and disability in subjects with patellofemoral pain syndrome. *Int J Sports Phys Ther.* 2018;13:462–73.
- 14 Giles L, Webster KE, McClelland J, *et al.* Quadriceps strengthening with and without blood flow restriction in the treatment of patellofemoral pain: a double-blind randomised trial. *Br J Sports Med.* 2017;51:1688–94.
- 15 Iammarrone CS, Cadossi M, Sambri A, *et al.* Is there a role of pulsed electromagnetic fields in management of patellofemoral pain syndrome? Randomized controlled study at one year follow-up. *Bioelectromagnetics.* 2016;37:81–8.

- 16 Petersen W, Ellermann A, Rembitzki IV, *et al.* Evaluating the potential synergistic benefit of a realignment brace on patients receiving exercise therapy for patellofemoral pain syndrome: a randomized clinical trial. *Arch Orthop Trauma Surg.* 2016;136:975–82.
- 17 Telles G, Cristovão DR, Belache FATC, *et al.* The effect of adding myofascial techniques to an exercise programme for patients with anterior knee pain. *J Bodyw Mov Ther.* 2016;20:844–50.
- 18 Mousavi SM, Khayambashi K, Nejadian SL, *et al.* The Effects of Kinesiotape and Strength Training on Knee Pain and Quadriceps Strength in People with Patellofemoral Pain Syndrome (PFPS). *J Isfahan Med Sch.* 2011;29:1657-68.
- 19 Whittingham M, Palmer S, Macmillan F. Effects of taping on pain and function in patellofemoral pain syndrome: a randomized controlled trial. *J Orthop Sports Phys Ther.* 2004;34:504–10.
- 20 Eng JJ, Pierrynowski MR. Evaluation of soft foot orthotics in the treatment of patellofemoral pain syndrome. *Phys Ther.* 1993;73:62–8; discussion 68-70.
