# Supplementary material
Source: HighWire-hosted journal article supplement (https://bjsm.bmj.com/content/58/14/792)
Supplement: inline-supplementary-material-7 [file inline-supplementary-material-7.pdf]

Table 1. Characteristics of included trials

| Trial<br><br>Year, author          | Participants           |                                                                                       |                                                                                       | Intervention                                                              |                                                                                | Outcome<br>measures                  |
|------------------------------------|------------------------|---------------------------------------------------------------------------------------|---------------------------------------------------------------------------------------|---------------------------------------------------------------------------|--------------------------------------------------------------------------------|--------------------------------------|
|                                    | Eligible<br>population | Adjunct treatment +<br>exercise                                                       | Exercise                                                                              | Adjunct treatment +<br>exercise                                           | Exercise                                                                       |                                      |
| Biophysical agents                 |                        |                                                                                       |                                                                                       |                                                                           |                                                                                |                                      |
| Jing et al.[1] 2024                | Patients               | Age (y) = 20.90 ± 2.70<br>F/M (%) = 22%/78%<br>BMI = NR                               | Age (y) = 21.60 ± 3.80<br>F/M (%) = 36%/64%<br>BMI = NR                               | Neuromuscular<br>electrical stimulation<br>+ exercise (n=18)              | Exercise (n=14)                                                                | Pain (VAS)<br><br>Function<br>(AKPS) |
| Albornoz-Cabello<br>et al.[2] 2023 | Patients               | Age (y) = 42.30 ± 15.52<br>F/M (%) = 41%/59%<br>BMI = 27.10 ± 3.98                    | Age (y) = 51.00 ± 10.89<br>F/M (%) = 62%/38%<br>BMI = 28.60 ± 4.32                    | Monopolar dielectric<br>diathermy (n=29)                                  | Exercise (n=27)                                                                | Pain (VAS)<br><br>Function<br>(AKPS) |
| Mv et al.[3] 2023                  | Patients               | Age (y) = 28.80 ± 1.00 <sup>#</sup><br>F/M (%) = NR<br>BMI = 26.30 ± 0.8 <sup>#</sup> | Age (y) = 29.20 ± 1.20 <sup>#</sup><br>F/M (%) = NR<br>BMI = 26.70 ± 0.8 <sup>#</sup> | Neuromuscular<br>electrical stimulation<br>+ exercise (n=31)              | Exercise (n=30)                                                                | Pain (VAS)<br><br>Function<br>(AKPS) |
| Qayyum et al.[4]<br>2022           | Patients               | Age (y) = 27.94 ± 6.36<br>F/M (%) = 54%/46%<br>BMI = NR                               | Age (y) = 27.45 ± 7.16<br>F/M (%) = 39%/61%<br>BMI =NR                                | High power laser<br>therapy + exercise<br>(n=33)                          | Exercise (n=33)                                                                | Pain (VAS)                           |
| Rodrigues et<br>al.[5] 2022        | Patients               | Age (y) = 21.70 ± 3.40<br>F/M (%) = 100%/0%<br>BMI = NR                               | Age (y) = 24.10 ± 3.90<br>F/M (%) = 100%/0%<br>BMI = NR                               | Anodal transcranial<br>direct current<br>stimulation + exercise<br>(n=14) | Sham anodal<br>transcranial direct<br>current stimulation +<br>exercise (n=14) | Pain (VAS)                           |
| Albornoz-Cabello<br>et al.[6] 2020 | Patients               | Age (y) = 48.00 ± 15.60<br>F/M (%) = NR<br>BMI = 28.30 ± 5.26                         | Age (y) = 52.00 ± 10.33<br>F/M (%) = NR<br>BMI = 28.20 ± 4.74                         | Monopolar dielectric<br>diathermy (n=42)                                  | Exercise (n=42)                                                                | Pain (VAS)<br><br>Function<br>(AKPS) |

|                               |               |                                                                   |                                                                   |                                                                           |                                                                                   |                                      |
|-------------------------------|---------------|-------------------------------------------------------------------|-------------------------------------------------------------------|---------------------------------------------------------------------------|-----------------------------------------------------------------------------------|--------------------------------------|
| Celik et al.[7]<br>2020       | Patients      | Age (y) = 39.10 ± 9.10<br>F/M (%) = 64%/36%<br>BMI = NR           | Age (y) = 41.50 ± 12.70<br>F/M (%) = 46%/54%<br>BMI = NR          | Neuromuscular<br>electrical stimulation<br>+ exercise (n=14)              | Exercise (n=13)                                                                   | Function<br>(AKPS)                   |
| Talbot et al.[8]<br>2020      | Army recruits | Age (y) = 26.50 ± 6.10<br>F/M (%) = 24%/76%<br>BMI = NR           | Age (y) = 26.80 ± 6.60<br>F/M (%) = 24%/76%<br>BMI = NR           | Neuromuscular<br>electrical stimulation<br>+ exercise (n=33)              | Exercise (n=34)                                                                   | Pain (VAS)                           |
| Glaviano et al.[9]<br>2019    | Patients      | Age (y) = 23.80 ± 5.60<br>F/M (%) = 73%/27%<br>BMI = NR           | Age (y) = 23.00 ± 3.70<br>F/M (%) = 80%/20%<br>BMI = NR           | Patterned electrical<br>neuromuscular<br>stimulation + exercise<br>(n=11) | Sham patterned<br>electrical<br>neuromuscular<br>stimulation +<br>exercise (n=10) | Pain (VAS)<br><br>Function<br>(AKPS) |
| Nouri et al.[10]<br>2019      | Patients      | Age (y) = 35.29 ± 3.27<br>F/M (%) = 70%/30%<br>BMI = 23.52 ± 3.99 | Age (y) = 31.43 ± 6.72<br>F/M (%) = 70%/30%<br>BMI = 23.26 ± 2.84 | Higher power laser +<br>exercise (n=20)                                   | Sham laser +<br>exercise (n=20)                                                   | Pain (VAS)<br><br>Function<br>(AKPS) |
| Iammarrone et<br>al.[11] 2016 | Patients      | Age (y) = 21.00 ± 7.00<br>F/M (%) = 77%/23%<br>BMI = NR           | Age (y) = 24.00 ± 8.00<br>F/M (%) = 71%/29%<br>BMI = NR           | Pulsed<br>electromagnetic fields<br>+ exercise (n=13)                     | Exercise (n=17)                                                                   | Pain (VAS)                           |
| Bily et al.[12]<br>2008       | Patients      | Age (y) = 27.00 ± 7.70<br>F/M (%) = 53%/47%<br>BMI = NR           | Age (y) = 23.70 ± 5.50<br>F/M (%) = 74%/26%<br>BMI = NR           | Electric muscle<br>stimulation + exercise<br>(n=19)                       | Exercise (n=19)                                                                   | Pain (VAS)<br><br>Function<br>(AKPS) |
| Akarcali et al.[13]<br>2002   | Patients      | Age (y) = 41.60 ± 9.58<br>F/M (%) = NR<br>BMI = NR                | Age (y) = 36.30 ± 9.59<br>F/M (%) = NR<br>BMI = NR                | High voltage electric<br>stimulation + exercise<br>(n=20)                 | Exercise (n=20)                                                                   | Pain (VAS)                           |
| <b>Taping</b>                 |               |                                                                   |                                                                   |                                                                           |                                                                                   |                                      |
| Lee et al.[14]<br>2023        | Patients      | Age (y) = 27.50 ± 5.40<br>F/M (%) = 75%/25%                       | Age (y) = 27.30 ± 7.40<br>F/M (%) = 84%/16%                       | Kinesio taping +<br>exercise (n=20)                                       | Exercise (n=19)                                                                   | Function<br>(AKPS)                   |

|                             |                       |                        |                         |                                                                    |                                       |                    |
|-----------------------------|-----------------------|------------------------|-------------------------|--------------------------------------------------------------------|---------------------------------------|--------------------|
|                             |                       | BMI = 21.90 ± 2.30     | BMI = 22.20 ± 1.70      |                                                                    |                                       |                    |
| Şahan et al.[15]<br>2023    | Patients              | Age (y) = 25.00 ± 6.23 | Age (y) = 25.23 ± 10.69 | Star taping + exercise<br>(n=14)                                   | Exercise (n=13)                       | Pain (VAS)         |
|                             |                       | F/M (%) = 86%/14%      | F/M (%) = 62%/38%       |                                                                    |                                       | Function<br>(AKPS) |
|                             |                       | BMI = 24.58 ± 3.66     | BMI = 22.01 ± 2.59      |                                                                    | Sham star taping +<br>exercise (n=12) |                    |
|                             |                       |                        | Age (y) = 26.91 ± 9.02  |                                                                    |                                       |                    |
|                             |                       |                        | F/M (%) = 58%/42%       |                                                                    |                                       |                    |
|                             |                       |                        | BMI = 24.12 ± 5.26      |                                                                    |                                       |                    |
| Songur et al.[16]<br>2023   | Patients              | Age (y) = 31.60 ± 9.50 | Age (y) = 28.25 ± 7.80  | McConnell patellar<br>taping + exercise<br>(n=13)                  | Exercise (n=13)                       | Pain (VAS)         |
|                             |                       | F/M (%) = 75%/25%      | F/M (%) = 75%/25%       |                                                                    |                                       | Function<br>(AKPS) |
|                             |                       | BMI = 23.53 ± 3.55     | BMI = 23.48 ± 2.47      |                                                                    |                                       |                    |
|                             |                       | Age (y) = 28.16 ± 8.40 |                         | Femoral rotation<br>taping + exercise<br>(n=14)                    |                                       |                    |
|                             |                       | F/M (%) = 83%/17%      |                         |                                                                    |                                       |                    |
|                             |                       | BMI = 22.75 ± 3.89     |                         |                                                                    |                                       |                    |
| Basbug et al.[17]<br>2022   | Sedentary<br>patients | Age (y) = 34.10 ± 8.90 | Age (y) = 39.00 ± 6.40  | Kinesio taping +<br>exercise (n=15)                                | Exercise (n=15)                       | Pain (VAS)         |
|                             |                       | F/M (%) = 100%/0%      | F/M (%) = 100%/0%       |                                                                    |                                       |                    |
|                             |                       | BMI = 23.90 ± 5.10     | BMI = 23.90 ± 5.30      |                                                                    |                                       |                    |
| Arrebola et<br>al.[18] 2020 | Patients              | Age (y) = 30.38 ± 8.40 | Age (y) = 30.31 ± 7.91  | Kinesio taping<br>(patellar<br>medialisation) +<br>exercise (n=13) | Exercise (n=16)                       | Pain (NPRS)        |
|                             |                       | F/M (%) = 100%/0%      | F/M (%) = 100%/0%       |                                                                    |                                       | Function<br>(AKPS) |
|                             |                       | BMI = 24.37 ± 2.60     | BMI = 22.68 ± 2.78      |                                                                    |                                       |                    |
|                             |                       | Age (y) = 27.86 ± 9.38 |                         | Kinesio taping (lateral<br>rotation of the femur                   |                                       |                    |
|                             |                       | F/M (%) = 100%/0%      |                         |                                                                    |                                       |                    |
|                             |                       | BMI = 23.37 ± 3.60     |                         |                                                                    |                                       |                    |

|                              |               |                                                                    |                                                                   |                                                                   |                                         |                                          |
|------------------------------|---------------|--------------------------------------------------------------------|-------------------------------------------------------------------|-------------------------------------------------------------------|-----------------------------------------|------------------------------------------|
|                              |               |                                                                    |                                                                   | and tibia) + exercise<br>(n=14)                                   |                                         |                                          |
| Ghourbanpour et al.[19] 2018 | Patients      | Age (y) = 33.85 ± 10.29<br>F/M (%) = NR<br>BMI = 24.70 ± 6.76      | Age (y) = 37.15 ± 12.45<br>F/M (%) = NR<br>BMI = 28.90 ± 4.99     | McConnell patellar<br>taping + exercise<br>(n=15)                 | Exercise (n=15)                         | Pain (VAS)<br><br>Function<br>(KOOS-ADL) |
| Günay et al.[20] 2017        | Patients      | Age (y) = 36.00 ± 7.95<br>F/M (%) = 69%/31%<br>BMI = 25.60 ± 2.64  | Age (y) = 31.00 ± 6.70<br>F/M (%) = 38%/62%<br>BMI = 25.20 ± 3.90 | Kinesio taping +<br>exercise (n=16)                               | Exercise (n=13)                         | Pain (VAS)<br><br>Function<br>(AKPS)     |
|                              |               |                                                                    |                                                                   | Age (y) = 30.80 ± 8.54<br>F/M (%) = 50%/50%<br>BMI = 24.20 ± 3.30 | Sham Kinesiotaping<br>+ exercise (n=14) |                                          |
| Akbaş et al.[21] 2011        | Patients      | Age (y) = 41.00 ± 11.26<br>F/M (%) = 100%/0%<br>BMI = 25.17 ± 4.80 | Age (y) = 44.88 ± 7.75<br>F/M (%) = 100%/0%<br>BMI = 28.64 ± 5.77 | Kinesio taping +<br>exercise (n=15)                               | Exercise (n=16)                         | Pain (VAS)<br><br>Function<br>(AKPS)     |
| Mousavi et al.[22] 2011      | Male students | Age (y) = NR<br>F/M = 0%/100%<br>BMI = NR                          | Age (y) = NR<br>F/M = 0%/100%<br>BMI = NR                         | Kinesio taping +<br>exercise (n=10)                               | Exercise (n=11)                         | Pain (VAS)                               |
| Whittingham et al.[23] 2004  | Arm recruits  | Age (y) = 18.80 ± 1.30<br>F/M (%) = 20%/80%<br>BMI = NR            | Age (y) = 18.70 ± 1.40<br>F/M (%) = 20%/80%<br>BMI = NR           | McConnell patellar<br>taping + exercise<br>(n=10)                 | Exercise (n=10)                         | Pain (VAS)<br><br>Function (FIQ)         |
|                              |               |                                                                    |                                                                   | Age (y) = 18.60 ± 1.10<br>F/M (%) = 20%/80%<br>BMI = NR           | Sham taping +<br>exercise (n=10)        |                                          |

|                                  |          |                                                                    |                                                                    |                                           |                                    |                                       |
|----------------------------------|----------|--------------------------------------------------------------------|--------------------------------------------------------------------|-------------------------------------------|------------------------------------|---------------------------------------|
| Tunay et al.[24]<br>2003         | Patients | Age (y) = 32.65 ± 6.22<br>F/M (%) = NR<br>BMI = 23.05 ± 2.67       | Age (y) = 28.00 ± 8.54<br>F/M (%) = NR<br>BMI = 21.69 ± 1.96       | Patellar taping +<br>exercise (n=20)      | Exercise (n=20)                    | Pain (VAS)                            |
| Clark et al.[25]<br>2000         | Patients | Age (y) = 26.00 ± 7.40<br>F/M (%) = 50%/50%<br>BMI = 24.80 ± 5.70  | Age (y) = 29.50 ± 6.20<br>F/M (%) = 40%/60%<br>BMI = 24.90 ± 4.20  | Taping + exercise<br>(n=20)               | Exercise (n=20)                    | Pain (VAS)<br><br>Function<br>(WOMAC) |
| Whole body vibration             |          |                                                                    |                                                                    |                                           |                                    |                                       |
| Wu et al.[26]<br>2022            | Patients | Age (y) = 27.50 ± 0.00<br>F/M (%) = 44%/56%<br>BMI = 22.20 ± 0.00  | Age (y) = 27.30 ± 0.00<br>F/M (%) = 50%/50%<br>BMI = 21.70 ± 0.00  | Whole body vibration<br>+ exercise (n=18) | Exercise (n=18)                    | Pain (VAS)<br><br>Function<br>(AKPS)  |
| Rasti et al.[27]<br>2020         | Athletes | Age (y) = 25.91 ± 5.16<br>F/M (%) = 0%/100%<br>BMI = 24.01 ± 0.78  | Age (y) = 24.16 ± 5.21<br>F/M (%) = 0%/100%<br>BMI = 24.31 ± 0.00  | Whole body vibration<br>+ exercise (n=12) | Exercise (n=12)                    | Pain (NRS)                            |
| Yañez-Álvarez et<br>al.[28] 2020 | Patients | Age (y) = 48.00 ± 13.00<br>F/M (%) = 56%/44%<br>BMI = 27.80 ± 3.80 | Age (y) = 52.00 ± 10.70<br>F/M (%) = 48%/52%<br>BMI = 28.50 ± 4.70 | Whole body vibration<br>+ exercise (n=25) | Exercise (n=25)                    | Pain (VAS)<br><br>Function<br>(AKPS)  |
| Corum et al.[29]<br>2018         | Patients | Age (y) = 32.70 ± 7.30<br>F/M (%) = 100%/0%<br>BMI = 24.20 ± 4.20  | Age (y) = 33.70 ± 7.70<br>F/M (%) = 100%/0%<br>BMI = 23.50 ± 3.10  | Whole body vibration<br>+ exercise (n=18) | Exercise (n=16)                    | Pain (VAS)<br><br>Function<br>(AKPS)  |
| Dry needling                     |          |                                                                    |                                                                    |                                           |                                    |                                       |
| Ma et al.[30]<br>2020            | Patients | Age (y) = 22.48 ± 2.40<br>F/M (%) = 48%/52%<br>BMI = 22.68 ± 2.69  | Age (y) = 25.14 ± 6.02<br>F/M (%) = 56%/44%<br>BMI = 21.84 ± 3.32  | Dry needling +<br>exercise (n=25)         | Sham needling +<br>exercise (n=23) | Pain (VAS)<br><br>Function<br>(AKPS)  |

|                             |              |                                                                   |                                                                   |                                                              |                                    |                                       |
|-----------------------------|--------------|-------------------------------------------------------------------|-------------------------------------------------------------------|--------------------------------------------------------------|------------------------------------|---------------------------------------|
| Zarei et al.[31]<br>2020    | Athletes     | Age (y) = 22.25 ± 3.25<br>F/M (%) = 100%/0%<br>BMI = NR           | Age (y) = 25.65 ± 8.49<br>F/M (%) = 100%/0%<br>BMI = NR           | Dry needling +<br>exercise (n=20)                            | Exercise (n=20)                    | Pain (NPRS)<br><br>Function<br>(AKPS) |
| Sutlive et al.[32]<br>2018  | Arm recruits | Age (y) = 30.30 ± 5.50<br>F/M (%) = 43%/57%<br>BMI = 26.40 ± 4.40 | Age (y) = 31.10 ± 5.10<br>F/M (%) = 33%/67%<br>BMI = 26.80 ± 3.20 | Dry needling +<br>exercise (n=30)                            | Sham needling +<br>exercise (n=30) | Pain (NPRS)<br><br>Function<br>(AKPS) |
| Knee brace                  |              |                                                                   |                                                                   |                                                              |                                    |                                       |
| Petersen et al.[33]<br>2016 | Patients     | Age (y) = 28.00 ± 9.40<br>F/M (%) = 66%/34%<br>BMI = 23.00 ± 1.50 | Age (y) = 28.00 ± 8.10<br>F/M (%) = 79%/21%<br>BMI = 23.00 ± 1.30 | Patellar brace +<br>exercise (n=78)                          | Exercise (n=78)                    | Pain (NAS)<br><br>Function<br>(AKPS)  |
| Denton et al.[34]<br>2005   | Patients     | Age (y) = 33.50 ± 8.80<br>F/M (%) = 100%/0%<br>BMI = NR           | Age (y) = 31.50 ± 9.80<br>F/M (%) = 100%/0%<br>BMI = NR           | Knee brace + exercise<br>(n=17)                              | Exercise (n=17)                    | Pain (VPS)<br><br>Function<br>(AKPS)  |
| Lun et al.[35]<br>2005      | Patients     | Age (y) = 35.00 ± 11.00<br>F/M (%) = NR<br>BMI = NR               | Age (y) = 35.00 ± 11.00<br>F/M (%) = NR<br>BMI = NR               | Patellar bracing +<br>exercise (n=32)                        | Exercise (n=34)                    | Pain (VAS)<br><br>Function<br>(KFS)   |
| Manual therapy              |              |                                                                   |                                                                   |                                                              |                                    |                                       |
| Anwar et al.[36]<br>2022    | Patients     | Age (y) = NR<br>F/M (%) = NR<br>BMI = NR                          | Age (y) = NR<br>F/M (%) = NR<br>BMI = NR                          | Pain release<br>phenomenon<br>technique + exercise<br>(n=NR) | Exercise (n= NR)                   | Pain (VAS)<br><br>Function<br>(LEFS)  |
| Fatimah et al.[37]<br>2021  | Patients     | Age (y) = 29.88 ± 3.06<br>F/M (%) = 77%/23%<br>BMI = NR           | Age (y) = 29.38 ± 3.45<br>F/M (%) = 73%/27%<br>BMI = NR           | Tibiofemoral<br>mobilisation +<br>exercise (n=26)            | Exercise (n=26)                    | Pain (NPRS)                           |

|                                         |                       |                                                                    |                                                                    |                                          |                                                  |                                    |
|-----------------------------------------|-----------------------|--------------------------------------------------------------------|--------------------------------------------------------------------|------------------------------------------|--------------------------------------------------|------------------------------------|
|                                         |                       |                                                                    |                                                                    |                                          |                                                  | Function (AKPS)                    |
| Telles et al.[38] 2016                  | Patients              | Age (y) = 63.30 ± 12.10<br>F/M (%) = NR<br>BMI = 27.20 ± 5.10      | Age (y) = 61.80 ± 17.30<br>F/M (%) = NR<br>BMI = 27.70 ± 4.50      | Myofascial technique + exercise (n=9)    | Exercise (n=9)                                   | Pain (NPRS)<br><br>Function (LEFS) |
| Blood flow restriction                  |                       |                                                                    |                                                                    |                                          |                                                  |                                    |
| Constantinou et al.[39] 2022            | Patients              | Age (y) = 25.50 ± 14.00<br>F/M (%) = 43%/57%<br>BMI = 24.60 ± 3.00 | Age (y) = 30.50 ± 16.00<br>F/M (%) = 47%/53%<br>BMI = 24.70 ± 4.30 | Blood flow restriction + exercise (n=30) | Exercise (n=30)                                  | Pain (VAS)<br><br>Function (AKPS)  |
| Giles et al.[40] 2017                   | Patients              | Age (y) = 28.50 ± 5.20<br>F/M (%) = 60%/40%<br>BMI = NR            | Age (y) = 26.70 ± 5.50<br>F/M (%) = 49%/51%<br>BMI = NR            | Blood flow restriction + exercise (n=40) | Placebo blood flow restriction + exercise (n=39) | Pain (VAS)<br><br>Function (AKPS)  |
| Electromyography biofeedback            |                       |                                                                    |                                                                    |                                          |                                                  |                                    |
| Qi et al.[41] 2007                      | Patients              | Age (y) = NR<br>F/M (%) = NR<br>BMI = NR                           | Age (y) = NR<br>F/M (%) = NR<br>BMI = NR                           | EMG Biofeedback + exercise (n=13)        | Exercise (n=13)                                  | Pain (PSS)                         |
| Dursun et al.[42] 2001                  | Patients              | Age (y) = 36.90 ± 9.20<br>F/M (%) = 80%/20%<br>BMI = NR            | Age (y) = 36.60 ± 10.60<br>F/M (%) = 80%/20%<br>BMI = NR           | EMG Biofeedback + exercise (n=30)        | Exercise (n=30)                                  | Pain (VAS)<br><br>Function (FIQ)   |
| Internal and external attentional focus |                       |                                                                    |                                                                    |                                          |                                                  |                                    |
| Aghakeshizadeh et al.[43] 2021          | Recreational athletes | Age (y) = 28.60 ± 7.70<br>F/M (%) = 52%/48%<br>BMI = 23.70 ± 1.90  | Age (y) = 28.90 ± 6.50<br>F/M (%) = 54%/46%<br>BMI = 23.70 ± 1.70  | Internal focus + exercise (n=23)         | Exercise (n=24)                                  | Pain (VAS)<br><br>Function (AKPS)  |
|                                         |                       | Age (y) = 29.90 ± 8.00<br>F/M (%) = 65%/35%                        |                                                                    |                                          |                                                  |                                    |

|                         |                      |                                                                  |                                                                   |                                  |                                         |                                  |
|-------------------------|----------------------|------------------------------------------------------------------|-------------------------------------------------------------------|----------------------------------|-----------------------------------------|----------------------------------|
|                         |                      | BMI = 23.90 ± 1.30                                               |                                                                   | External focus + exercise (n=23) |                                         |                                  |
| Mindfulness             |                      |                                                                  |                                                                   |                                  |                                         |                                  |
| Bagheri et al.[44] 2021 | Recreational runners | Age (y) = 27.90 ± 7.50<br>F/M (%) = 100%/0%<br>BMI =23.70 ± 2.30 | Age (y) = 28.80 ± 6.80<br>F/M (%) = 100%/0%<br>BMI = 23.20 ± 2.60 | Mindfulness + exercise (n=15)    | Exercise (n=14)                         | Pain (VAS)<br><br>Function (KOS) |
| Foot orthoses           |                      |                                                                  |                                                                   |                                  |                                         |                                  |
| Eng et al.[45] 1993     | Adolescents          | Age (y) = 14.40 ± 1.10<br>F/M (%) = 100%/0%<br>BMI = NR          | Age (y) = 15.10 ± 1.40<br>F/M (%) = 100%/0%<br>BMI = NR           | Foot orthoses + exercise (n=10)  | Placebo foot orthoses + exercise (n=10) | Pain (VAS)                       |

Abbreviation: *F*, female; *M*, male; *n*, sample size; *BMI*, body mass index; *NR*, not reported; *VAS*, visual analogue scale; *FIQ*, functional index questionnaire; *NPRS*, numerical pain rating scale; *AKPS*, anterior knee pain scale; *WOMAC*, Western Ontario and McMaster Universities; *PSS*, pain severity scale; *EMG*, electromyographic; *NAS*, numerical analogue scale; *NRS*, numerical rating scale, *LEFS*, lower extremity functional scale; #: standard error; *KOOS-ADL*, Knee Injury and Osteoarthritis Outcome - Activities of Daily Living; *VPS*, verbal pain scale; *KFS*, knee function scale; *KOS*, knee outcome survey.



## References

- 1 Jing W, Yingce Y, Xiaowei Y, *et al.* Intervention of muscle strength training combined with neuromuscular electrical stimulation on lower limb function and biomechanical changes in patients with patellofemoral pain. *CJTER*. 2024;28(9):1365-1371. doi:10.12307/2024.036.3.
- 2 Albornoz-Cabello M, Ibáñez-Vera AJ, Barrios-Quinta CJ, *et al.* Effects of Radiofrequency Diathermy Plus Therapeutic Exercises on Pain and Functionality of Patients with Patellofemoral Pain Syndrome: A Randomized Controlled Trial. *J Clin Med*. 2023;12:2348.
- 3 MV VK, Subramanian NB, Sreelatha S, *et al.* Physiotherapeutic interventions on quadriceps muscle architecture in patello-femoral pain syndrome. *Bioinformation*. 2023;19:454–9.
- 4 Qayyum HA, Arsalan SA, Tanveer F, *et al.* Role of high power laser therapy on pain reduction in patients with patellofemoral pain syndrome. *Pak J Med Health Sci*. 2022;16:9–12.
- 5 Rodrigues GM, Paixão A, Arruda T, *et al.* Anodal transcranial direct current stimulation increases muscular strength and reduces pain perception in women with patellofemoral pain. *J Strength Cond Res*. 2022;36:371–8.
- 6 Albornoz-Cabello M, Ibáñez-Vera AJ, Aguilar-Ferrándiz ME, *et al.* Monopolar dielectric diathermy by emission of radiofrequency in Patellofemoral pain. A single-blind-randomized clinical trial. *Electromagn Biol Med*. 2020;39:282–9.
- 7 Celik D, Argut SK, Türker N, *et al.* The effectiveness of superimposed neuromuscular electrical stimulation combined with strengthening exercises on patellofemoral pain: A randomized controlled pilot trial. *J Back Musculoskelet Rehabil*. 2020;33:693–9.

- 8 Talbot LA, Solomon Z, Webb L, *et al.* Electrical Stimulation Therapies for Active Duty Military with Patellofemoral Pain Syndrome: A Randomized Trial. *Mil Med.* 2020;185:e963–71.
- 9 Glaviano NR, Marshall AN, Mangum LC, *et al.* Impairment-based rehabilitation with patterned electrical neuromuscular stimulation and lower extremity function in individuals with patellofemoral pain: a preliminary study. *J Athl Train.* 2019;54:255–69.
- 10 Nouri F, Raeissadat SA, Eliaspour D, *et al.* Efficacy of high-power laser in alleviating pain and improving function of patients with patellofemoral pain syndrome: a single-blind randomized controlled trial. *J Lasers Med Sci.* 2019;10:37–43.
- 11 Iammarrone CS, Cadossi M, Sambri A, *et al.* Is there a role of pulsed electromagnetic fields in management of patellofemoral pain syndrome? Randomized controlled study at one year follow-up. *Bioelectromagnetics.* 2016;37:81–8.
- 12 Bily W, Trimmel L, Mödlin M, *et al.* Training program and additional electric muscle stimulation for patellofemoral pain syndrome: a pilot study. *Arch Phys Med Rehabil.* 2008;89:1230–6.
- 13 Akarcali I, Tugay N, Kaya D, *et al.* The role of high voltage electrical stimulation in the rehabilitation of patellofemoral pain. *Pain Clin.* 2002;14:207–12.
- 14 Lee JH, Rhim HC, Jang K-M. Effect of Adding Kinesio Taping to Exercise Therapy in the Treatment of Patellofemoral Pain Syndrome. *Medicina (Mex).* 2023;59:754.
- 15 Şahan TY, Vergili Ö, Oktaş B. Investigation of new application technique named star taping in patellofemoral pain: a randomized, single-blind, and placebo-controlled study. *Somatosens Mot Res.* 2023;1–8.
- 16 Songur A, Demirdel E, Kılıc O, *et al.* The effects of different taping methods on patellofemoral alignment, pain and function in individuals with patellofemoral pain:

- A randomized controlled trial. *PM R*. Published Online First: 29 August 2023. doi: 10.1002/pmrj.13067.
- 17 Basbug P, Kilic RT, Atay AO, *et al*. The effects of progressive neuromuscular exercise program and taping on muscle strength and pain in patellofemoral pain. A randomized controlled blind study. *Somatosens Mot Res*. 2022;39:39–45.
  - 18 Arrebola LS, Teixeira de Carvalho R, Lam Wun PY, *et al*. Investigation of different application techniques for Kinesio Taping® with an accompanying exercise protocol for improvement of pain and functionality in patients with patellofemoral pain syndrome: A pilot study. *J Bodyw Mov Ther*. 2020;24:47–55.
  - 19 Ghourbanpour A, Talebi GA, Hosseinzadeh S, *et al*. Effects of patellar taping on knee pain, functional disability, and patellar alignments in patients with patellofemoral pain syndrome: A randomized clinical trial. *J Bodyw Mov Ther*. 2018;22:493–7.
  - 20 Günay E, Sarıkaya S, Özdolap Ş, *et al*. Effectiveness of the kinesiotaping in the patellofemoral pain syndrome. *Turk J Phys Med Rehabil*. 2017;63:299–306.
  - 21 Akbaş E, Atay AO, Yüksel I. The effects of additional kinesio taping over exercise in the treatment of patellofemoral pain syndrome. *Acta Orthop Traumatol Turc*. 2011;45:335–41.
  - 22 Mousavi SM, Khayambashi K, Nejadian SL, *et al*. The Effects of Kinesiotape and Strength Training on Knee Pain and Quadriceps Strength in People with Patellofemoral Pain Syndrome (PFPS). *J Isfahan Med Sch*. 2011;29:1657–68.
  - 23 Whittingham M, Palmer S, Macmillan F. Effects of taping on pain and function in patellofemoral pain syndrome: a randomized controlled trial. *J Orthop Sports Phys Ther*. 2004;34:504–10.
  - 24 Tunay VB, Baltacı G, Tunay S, *et al*. A comparison of different treatment approaches to patellofemoral pain syndrome. *The Pain Clinic*. 2003;15:179–84.

- 25 Clark DI, Downing N, Mitchell J, *et al.* Physiotherapy for anterior knee pain: a randomised controlled trial. *Ann Rheum Dis.* 2000;59:700–4.
- 26 Wu Z, Zou Z, Zhong J, *et al.* Effects of whole-body vibration plus hip-knee muscle strengthening training on adult patellofemoral pain syndrome: a randomized controlled trial. *Disabil Rehabil.* 2022;44:6017–25.
- 27 Rasti E, Rojhani-Shirazi Z, Ebrahimi N, *et al.* Effects of whole body vibration with exercise therapy versus exercise therapy alone on flexibility, vertical jump height, agility and pain in athletes with patellofemoral pain: a randomized clinical trial. *BMC Musculoskelet Disord.* 2020;21:705.
- 28 Yañez-Álvarez A, Bermúdez-Pulgarín B, Hernández-Sánchez S, *et al.* Effects of exercise combined with whole body vibration in patients with patellofemoral pain syndrome: a randomised-controlled clinical trial. *BMC Musculoskelet Disord.* 2020;21:582.
- 29 Corum M, Basoglu C, Yakal S, *et al.* Effects of whole body vibration training on isokinetic muscular performance, pain, function, and quality of life in female patients with patellofemoral pain: a randomized controlled trial. *J Musculoskelet Neuronal Interact.* 2018;18:473–84.
- 30 Ma Y-T, Li L-H, Han Q, *et al.* Effects of trigger point dry needling on neuromuscular performance and pain of individuals affected by patellofemoral pain: a randomized controlled trial. *J Pain Res.* 2020;13:1677–86.
- 31 Zarei H, Bervis S, Piroozi S, *et al.* Added value of gluteus medius and quadratus lumborum dry needling in improving knee pain and function in female athletes with patellofemoral pain syndrome: a randomized clinical trial. *Arch Phys Med Rehabil.* 2020;101:265–74.

- 32 Sutlive TG, Golden A, King K, *et al.* Short-term effects of trigger point dry needling on pain and disability in subjects with patellofemoral pain syndrome. *Int J Sports Phys Ther.* 2018;13:462–73.
- 33 Petersen W, Ellermann A, Rembitzki IV, *et al.* Evaluating the potential synergistic benefit of a realignment brace on patients receiving exercise therapy for patellofemoral pain syndrome: a randomized clinical trial. *Arch Orthop Trauma Surg.* 2016;136:975–82.
- 34 Denton J, Willson JD, Ballantyne BT, *et al.* The addition of the Protonics brace system to a rehabilitation protocol to address patellofemoral joint syndrome. *J Orthop Sports Phys Ther.* 2005;35:210–9.
- 35 Lun VMY, Wiley JP, Meeuwisse WH, *et al.* Effectiveness of patellar bracing for treatment of patellofemoral pain syndrome. *Clin J Sport Med.* 2005;15:235–40.
- 36 Anwar S, Javaid M, Malik S, *et al.* Effects of mulligan pain release phenomenon technique in management of patellofemoral pain syndrome: RCT. *Pak J Med Health Sci.* 2022;16:72–72. doi: 10.53350/pjmhs2216372.
- 37 Fatimah I, Waqqar S. Effects of tibiofemoral mobilization in patients of Patellofemoral pain syndrome. *JPMA J Pak Med Assoc.* 2021;71:2506–10.
- 38 Telles G, Cristovão DR, Belache FATC, *et al.* The effect of adding myofascial techniques to an exercise programme for patients with anterior knee pain. *J Bodyw Mov Ther.* 2016;20:844–50.
- 39 Constantinou A, Mamais I, Papathanasiou G, *et al.* Comparing hip and knee focused exercises versus hip and knee focused exercises with the use of blood flow restriction training in adults with patellofemoral pain. *Eur J Phys Rehabil Med.* 2022;58:225–35.

- 40 Giles L, Webster KE, McClelland J, *et al.* Quadriceps strengthening with and without blood flow restriction in the treatment of patellofemoral pain: a double-blind randomised trial. *Br J Sports Med.* 2017;51:1688–94.
- 41 Qi Z, Ng GYF. EMG analysis of vastus medialis obliquus/vastus lateralis activities in subjects with patellofemoral pain syndrome before and after a home exercise program. *J Phys Ther Sci.* 2007;19:131–7.
- 42 Dursun N, Dursun E, Kiliç Z. Electromyographic biofeedback-controlled exercise versus conservative care for patellofemoral pain syndrome. *Arch Phys Med Rehabil.* 2001;82:1692–5.
- 43 Aghakeshizadeh F, Letafatkar A, Thomas AC. Internal and external focus show similar effect on the gait kinematics in patients with patellofemoral pain: A randomised controlled trial. *Gait Posture.* 2021;84:155–61.
- 44 Bagheri S, Naderi A, Mirali S, *et al.* Adding mindfulness practice to exercise therapy for female recreational runners with patellofemoral pain: a randomized controlled trial. *J Athl Train.* 2021;56:902–11.
- 45 Eng JJ, Pierrynowski MR. Evaluation of soft foot orthotics in the treatment of patellofemoral pain syndrome. *Phys Ther.* 1993;73:62–8; discussion 68-70.
