# Supplementary material
Source: HighWire-hosted journal article supplement (https://bjsm.bmj.com/content/58/14/792)
Supplement: inline-supplementary-material-10 [file inline-supplementary-material-10.pdf]

A) Effect of knee taping for patellar medialisation only as adjunct treatment on self-reported pain

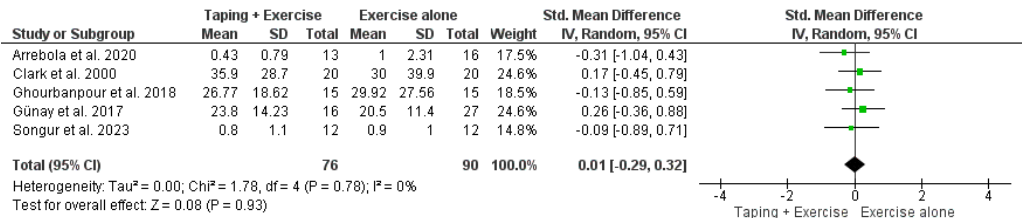

B) Effect of knee taping for patellar medialisation only as adjunct treatment on self-reported function

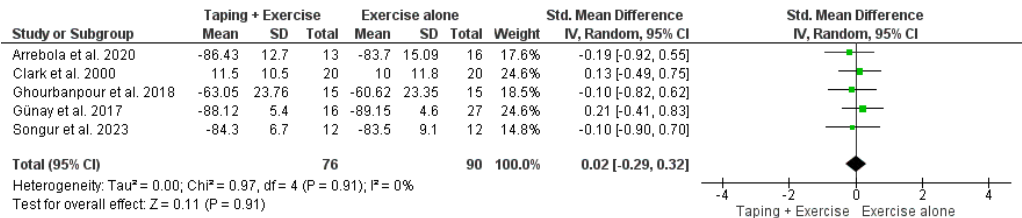

C) Effect of patellar taping as adjunct treatment on self-reported pain

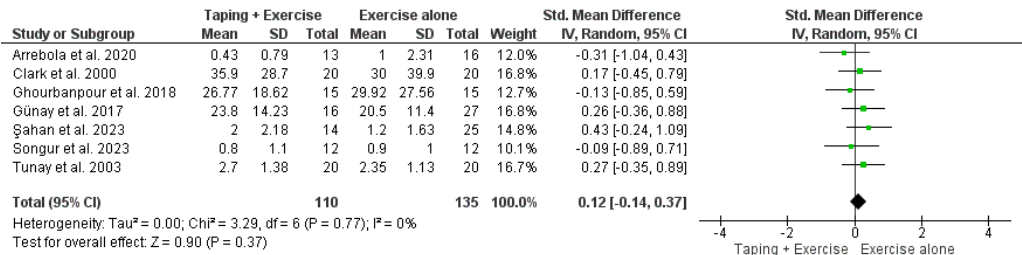

D) Effect of patellar taping as adjunct treatment on self-reported function

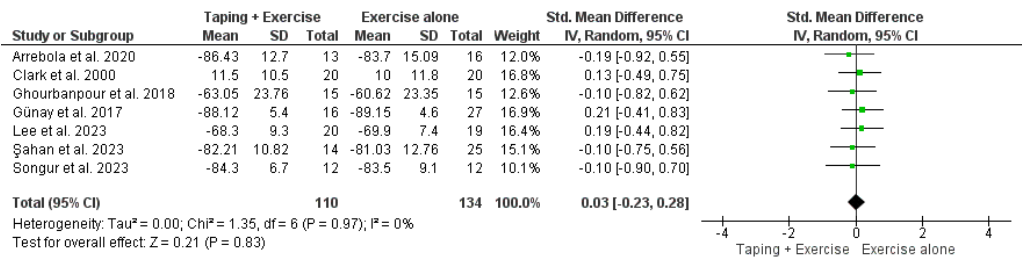

E) Effect of knee kinesio taping as adjunct treatment on self-reported pain

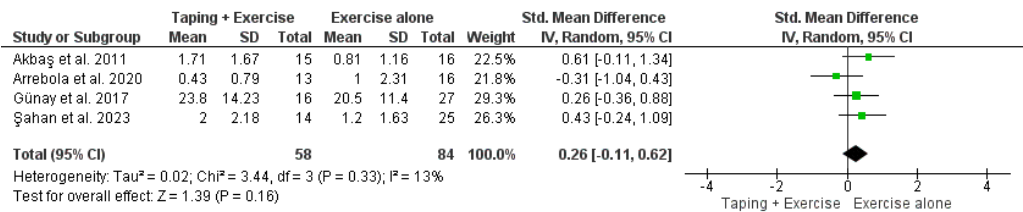

F) Effect of knee kinesio taping as adjunct treatment on self-reported function

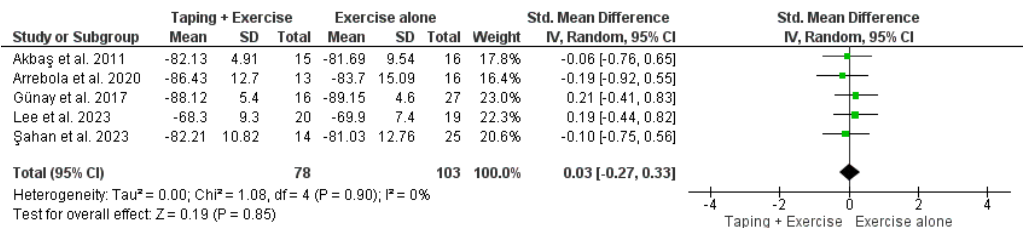

G) Effect of untailored knee taping for patellar medialisation only as adjunct treatment on self-reported pain

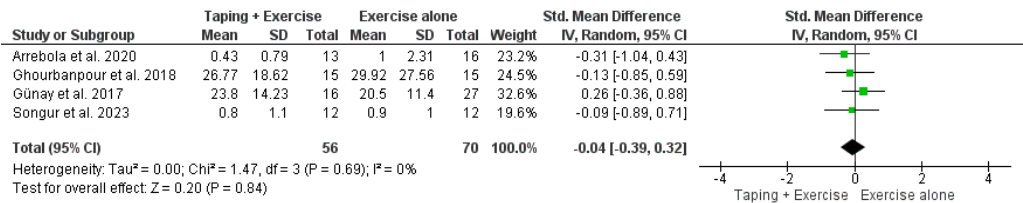

H) Effect of untailored knee taping for patellar medialisation only as adjunct treatment on self-reported function

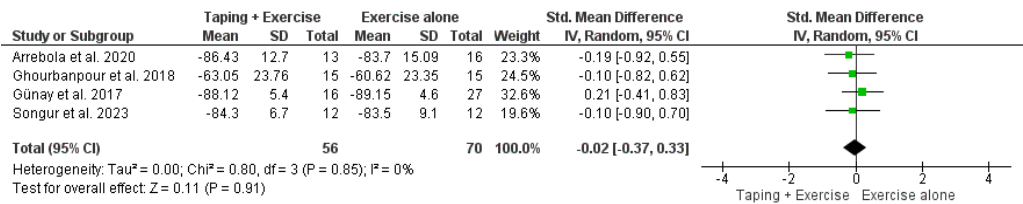

I) Effect of untailored patellar taping as adjunct treatment on self-reported pain

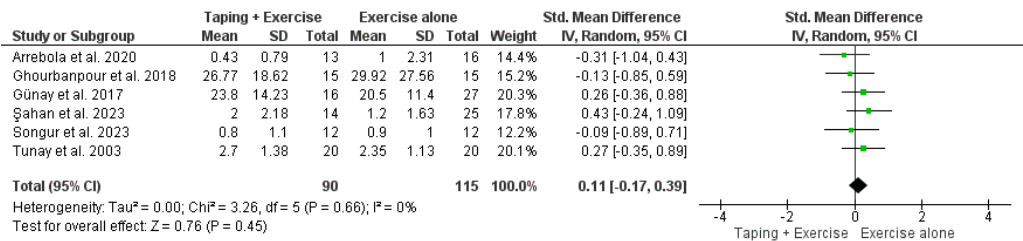

J) Effect of untailored patellar taping as adjunct treatment on self-reported function

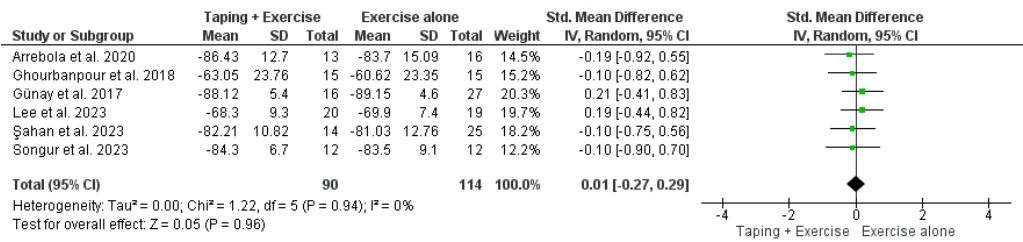

**Figure 1.** Effects of knee taping for patellar medialisation combined with exercise therapy (A, B), patellar taping combined with exercise therapy (C, D), knee kinesio taping combined with exercise therapy (E, F), untailored knee taping for patellar medialisation combined with exercise therapy (I, J) and untailored patellar taping combined with exercise therapy (K, L) compared with exercise therapy alone for self-reported pain and function at short-term. (SD, standard deviation; IV, inverse variance; Std., standard mean difference). The self-reported function values were inverted to negative to ensure consistent reporting. Akbaş et al. 2011, Clark et al. 2000, Ghourbanpour et al. 2018, Günay et al. 2017, Şahan et al. 2023, Songur et al. 2023 and Tunay et al 2003 assessed the self-reported measure of pain using the Visual Analogue Scale (VAS) while Arrebola et al. 2020 assessed it using the Numerical Pain Rating Scale (NPRS). Akbaş et al. 2011, Arrebola et al. 2020, Günay et al. 2017, Lee et al. 2023, Şahan et al. 2023 and Songur et al. 2023 assessed the self-reported measure of function using the Anterior Knee Pain Scale (AKPS), while Clark et al. 2020 and Ghourbanpour et al. 2018 assessed it using the Western Ontario and McMaster Universities Osteoarthritis Index (WOMAC) and the Knee Injury and Osteoarthritis Outcome Score - Activities of Daily Living (KOOS-ADL), respectively.
