# Supplementary material
Source: HighWire-hosted journal article supplement (https://bjsm.bmj.com/content/58/14/792)
Supplement: inline-supplementary-material-11 [file inline-supplementary-material-11.pdf]

**Table 1.** Template for intervention description and replication (TIDieR) checklist score

| Year, trial                     | Intervention | Criteria |   |   |   |   |   |   |   |   |    |    |    | Score |
|---------------------------------|--------------|----------|---|---|---|---|---|---|---|---|----|----|----|-------|
|                                 |              | 1        | 2 | 3 | 4 | 5 | 6 | 7 | 8 | 9 | 10 | 11 | 12 |       |
| Jing et al.[1] 2024             | Adjunct      | 2        | 2 | 2 | 2 | 0 | 2 | 0 | 2 | 2 | 0  | 0  | 0  | 14    |
|                                 | Exercise     | 2        | 2 | 0 | 2 | 2 | 0 | 0 | 2 | 2 | 0  | 0  | 0  | 12    |
| Albornoz-Cabello et al.[2] 2023 | Adjunct      | 2        | 2 | 2 | 2 | 2 | 2 | 0 | 2 | 0 | 0  | 0  | 0  | 14    |
|                                 | Exercise     | 2        | 2 | 2 | 2 | 2 | 1 | 0 | 2 | 0 | 0  | 0  | 0  | 13    |
| Lee et al.[3] 2023              | Adjunct      | 2        | 2 | 2 | 2 | 2 | 2 | 2 | 0 | 0 | 0  | 0  | 0  | 14    |
|                                 | Exercise     | 2        | 2 | 1 | 0 | 0 | 1 | 2 | 1 | 2 | 0  | 2  | 0  | 13    |
| Mv et al.[4] 2023               | Adjunct      | 0        | 1 | 1 | 2 | 0 | 1 | 0 | 2 | 0 | 0  | 0  | 0  | 7     |
|                                 | Exercise     | 0        | 1 | 1 | 2 | 2 | 0 | 0 | 2 | 0 | 0  | 0  | 0  | 8     |
| Şahan et al.[5] 2023            | Adjunct      | 2        | 2 | 1 | 2 | 2 | 2 | 2 | 0 | 0 | 0  | 0  | 0  | 13    |
|                                 | Exercise     | 0        | 0 | 1 | 2 | 2 | 2 | 2 | 1 | 0 | 0  | 0  | 0  | 10    |
| Songur et al.[6] 2023           | Adjunct      | 2        | 2 | 1 | 2 | 0 | 2 | 0 | 2 | 0 | 0  | 0  | 0  | 11    |
|                                 | Exercise     | 0        | 2 | 1 | 0 | 0 | 1 | 1 | 1 | 0 | 0  | 0  | 0  | 6     |
| Anwar et al.[7] 2022            | Adjunct      | 2        | 2 | 2 | 2 | 0 | 2 | 2 | 2 | 0 | 0  | 0  | 0  | 14    |
|                                 | Exercise     | 0        | 0 | 2 | 2 | 0 | 0 | 2 | 2 | 0 | 0  | 0  | 0  | 8     |
| Basbug et al.[8] 2022           | Adjunct      | 2        | 2 | 2 | 2 | 0 | 2 | 0 | 2 | 0 | 0  | 0  | 0  | 12    |
|                                 | Exercise     | 2        | 2 | 2 | 2 | 2 | 2 | 2 | 1 | 0 | 0  | 2  | 0  | 17    |
| Constantinou et al.[9] 2022     | Adjunct      | 2        | 2 | 2 | 2 | 2 | 2 | 2 | 2 | 2 | 0  | 0  | 2  | 20    |
|                                 | Exercise     | 2        | 2 | 2 | 2 | 2 | 2 | 2 | 2 | 2 | 2  | 0  | 2  | 22    |
| Qayyum et al.[10] 2022          | Adjunct      | 2        | 2 | 1 | 2 | 0 | 0 | 0 | 2 | 0 | 0  | 0  | 0  | 9     |
|                                 | Exercise     | 0        | 0 | 1 | 2 | 0 | 0 | 0 | 2 | 0 | 0  | 0  | 0  | 5     |
| Rodrigues et al.[11] 2022       | Adjunct      | 2        | 2 | 2 | 2 | 0 | 2 | 2 | 2 | 0 | 0  | 0  | 0  | 14    |
|                                 | Exercise     | 0        | 2 | 2 | 2 | 0 | 2 | 2 | 2 | 2 | 0  | 0  | 0  | 14    |
| Wu et al.[12] 2022              | Adjunct      | 2        | 2 | 2 | 2 | 0 | 2 | 2 | 2 | 2 | 0  | 0  | 0  | 16    |
|                                 | Exercise     | 2        | 2 | 2 | 2 | 0 | 1 | 2 | 2 | 2 | 0  | 0  | 0  | 15    |
| Aghakeshizadeh et al.[13] 2021  | Adjunct      | 2        | 2 | 2 | 2 | 2 | 2 | 0 | 2 | 2 | 0  | 0  | 2  | 18    |
|                                 | Exercise     | 0        | 2 | 2 | 1 | 2 | 2 | 0 | 2 | 2 | 0  | 0  | 2  | 15    |
| Bagheri et al.[14] 2021         | Adjunct      | 2        | 2 | 2 | 2 | 2 | 2 | 2 | 2 | 2 | 0  | 0  | 2  | 20    |
|                                 | Exercise     | 2        | 2 | 2 | 2 | 2 | 1 | 2 | 2 | 2 | 0  | 0  | 2  | 19    |
| Fatimah et al.[15] 2021         | Adjunct      | 2        | 2 | 2 | 2 | 0 | 2 | 2 | 2 | 0 | 0  | 0  | 0  | 14    |
|                                 | Exercise     | 0        | 1 | 2 | 2 | 0 | 1 | 2 | 2 | 0 | 0  | 0  | 0  | 10    |

|                                  |          |   |   |   |   |   |   |   |   |   |   |   |   |    |
|----------------------------------|----------|---|---|---|---|---|---|---|---|---|---|---|---|----|
| Albornoz-Cabello et al.[16] 2020 | Adjunct  | 2 | 2 | 2 | 2 | 2 | 2 | 0 | 2 | 0 | 0 | 0 | 0 | 14 |
|                                  | Exercise | 0 | 2 | 2 | 1 | 0 | 2 | 2 | 2 | 0 | 0 | 0 | 0 | 11 |
| Arrebola et al.[17] 2020         | Adjunct  | 2 | 2 | 2 | 2 | 2 | 2 | 2 | 2 | 0 | 0 | 0 | 2 | 18 |
|                                  | Exercise | 2 | 2 | 0 | 2 | 2 | 1 | 2 | 2 | 0 | 0 | 0 | 2 | 15 |
| Celik et al.[18] 2020            | Adjunct  | 2 | 2 | 2 | 2 | 2 | 2 | 0 | 2 | 0 | 0 | 0 | 0 | 14 |
|                                  | Exercise | 2 | 2 | 1 | 1 | 2 | 1 | 1 | 2 | 0 | 0 | 0 | 0 | 12 |
| Ma et al.[19] 2020               | Adjunct  | 2 | 2 | 2 | 2 | 2 | 2 | 0 | 0 | 0 | 0 | 0 | 0 | 12 |
|                                  | Exercise | 0 | 2 | 2 | 2 | 0 | 0 | 0 | 1 | 0 | 0 | 0 | 0 | 7  |
| Rasti et al.[20] 2020            | Adjunct  | 2 | 2 | 2 | 2 | 2 | 2 | 0 | 2 | 0 | 0 | 0 | 0 | 14 |
|                                  | Exercise | 2 | 2 | 2 | 2 | 2 | 1 | 0 | 2 | 0 | 0 | 0 | 0 | 13 |
| Talbot et al.[21] 2020           | Adjunct  | 2 | 0 | 2 | 2 | 0 | 2 | 2 | 2 | 2 | 0 | 2 | 0 | 16 |
|                                  | Exercise | 0 | 0 | 0 | 0 | 0 | 0 | 2 | 0 | 0 | 0 | 2 | 0 | 4  |
| Zarei et al.[22] 2020            | Adjunct  | 2 | 2 | 2 | 2 | 2 | 2 | 2 | 2 | 0 | 0 | 0 | 0 | 16 |
|                                  | Exercise | 0 | 0 | 2 | 2 | 2 | 2 | 2 | 2 | 2 | 0 | 0 | 0 | 14 |
| Yañez-Álvarez et al.[23] 2020    | Adjunct  | 2 | 2 | 2 | 2 | 2 | 2 | 2 | 2 | 2 | 0 | 0 | 0 | 18 |
|                                  | Exercise | 2 | 2 | 2 | 2 | 2 | 2 | 2 | 2 | 2 | 0 | 0 | 0 | 18 |
| Glaviano et al.[24] 2019         | Adjunct  | 2 | 2 | 2 | 2 | 2 | 2 | 2 | 2 | 0 | 0 | 2 | 2 | 20 |
|                                  | Exercise | 0 | 2 | 2 | 2 | 2 | 1 | 2 | 2 | 2 | 0 | 2 | 2 | 19 |
| Nouri et al.[25] 2019            | Adjunct  | 2 | 2 | 2 | 2 | 2 | 2 | 0 | 2 | 0 | 0 | 0 | 0 | 14 |
|                                  | Exercise | 0 | 2 | 2 | 2 | 0 | 2 | 0 | 2 | 0 | 0 | 2 | 0 | 12 |
| Corum et al.[26] 2018            | Adjunct  | 2 | 2 | 2 | 2 | 0 | 2 | 2 | 2 | 0 | 0 | 0 | 0 | 14 |
|                                  | Exercise | 0 | 2 | 2 | 2 | 0 | 2 | 2 | 1 | 0 | 0 | 0 | 0 | 11 |
| Ghourbanpour et al.[27] 2018     | Adjunct  | 2 | 2 | 1 | 0 | 0 | 2 | 0 | 2 | 0 | 0 | 0 | 0 | 9  |
|                                  | Exercise | 0 | 1 | 0 | 0 | 0 | 0 | 0 | 1 | 0 | 0 | 0 | 0 | 2  |
| Sutlive et al.[28] 2018          | Adjunct  | 2 | 2 | 2 | 2 | 0 | 2 | 0 | 2 | 0 | 0 | 0 | 0 | 12 |
|                                  | Exercise | 0 | 1 | 2 | 1 | 0 | 2 | 2 | 1 | 0 | 0 | 0 | 0 | 9  |
| Giles et al.[29] 2017            | Adjunct  | 2 | 2 | 2 | 2 | 2 | 2 | 0 | 2 | 2 | 0 | 2 | 0 | 18 |
|                                  | Exercise | 2 | 2 | 2 | 2 | 2 | 2 | 0 | 2 | 2 | 0 | 2 | 0 | 18 |
| Günay et al.[30] 2017            | Adjunct  | 2 | 2 | 2 | 2 | 2 | 2 | 2 | 1 | 0 | 0 | 0 | 0 | 15 |
|                                  | Exercise | 0 | 2 | 0 | 1 | 2 | 1 | 2 | 1 | 0 | 0 | 0 | 0 | 9  |
| Iammarrone et al.[31] 2016       | Adjunct  | 2 | 2 | 2 | 2 | 2 | 2 | 2 | 2 | 0 | 0 | 2 | 0 | 18 |
|                                  | Exercise | 0 | 2 | 2 | 0 | 2 | 2 | 2 | 2 | 2 | 0 | 2 | 0 | 16 |
|                                  | Adjunct  | 2 | 2 | 2 | 2 | 2 | 2 | 2 | 2 | 2 | 0 | 0 | 0 | 18 |

|                             |          |   |   |   |   |   |   |   |   |   |   |   |   |    |
|-----------------------------|----------|---|---|---|---|---|---|---|---|---|---|---|---|----|
| Petersen et al.[32]<br>2016 | Exercise | 2 | 2 | 0 | 0 | 0 | 1 | 1 | 1 | 2 | 0 | 0 | 0 | 9  |
| Telles et al.[33]<br>2016   | Adjunct  | 2 | 1 | 2 | 2 | 2 | 2 | 0 | 2 | 2 | 0 | 0 | 0 | 15 |
|                             | Exercise | 0 | 1 | 2 | 2 | 2 | 1 | 0 | 2 | 2 | 0 | 0 | 0 | 12 |
| Akbaş et al.[34]<br>2011    | Adjunct  | 2 | 2 | 0 | 0 | 0 | 2 | 0 | 2 | 2 | 0 | 0 | 0 | 10 |
|                             | Exercise | 2 | 2 | 0 | 0 | 0 | 2 | 2 | 1 | 0 | 0 | 0 | 0 | 9  |
| Mousavi et al.[35]<br>2011  | Adjunct  | 2 | 1 | 2 | 2 | 0 | 1 | 2 | 2 | 0 | 0 | 0 | 0 | 12 |
|                             | Exercise | 2 | 1 | 2 | 2 | 0 | 1 | 2 | 2 | 0 | 0 | 0 | 0 | 12 |
| Bily et al.[36]<br>2008     | Adjunct  | 2 | 2 | 2 | 2 | 2 | 2 | 0 | 2 | 2 | 0 | 2 | 0 | 18 |
|                             | Exercise | 2 | 2 | 2 | 2 | 2 | 2 | 0 | 2 | 2 | 0 | 2 | 0 | 18 |
| Qi et al.[37] 2007          | Adjunct  | 0 | 2 | 2 | 2 | 2 | 2 | 2 | 2 | 0 | 0 | 0 | 0 | 14 |
|                             | Exercise | 2 | 0 | 0 | 1 | 2 | 2 | 2 | 2 | 2 | 0 | 0 | 0 | 13 |
| Denton et al.[38]<br>2005   | Adjunct  | 2 | 2 | 2 | 2 | 0 | 2 | 2 | 2 | 2 | 0 | 0 | 0 | 16 |
|                             | Exercise | 0 | 1 | 2 | 2 | 0 | 1 | 2 | 2 | 2 | 0 | 0 | 0 | 12 |
| Lun et al.[39]<br>2005      | Adjunct  | 2 | 1 | 2 | 2 | 0 | 2 | 2 | 2 | 0 | 0 | 2 | 0 | 15 |
|                             | Exercise | 0 | 1 | 2 | 2 | 0 | 2 | 2 | 2 | 2 | 0 | 2 | 0 | 15 |
| Whittingham et al.[40] 2004 | Adjunct  | 2 | 2 | 1 | 2 | 2 | 2 | 2 | 2 | 2 | 0 | 0 | 0 | 17 |
|                             | Exercise | 0 | 2 | 2 | 2 | 2 | 1 | 2 | 2 | 2 | 2 | 0 | 0 | 17 |
| Dursun et al.[41]<br>2001   | Adjunct  | 2 | 2 | 2 | 2 | 0 | 2 | 2 | 2 | 0 | 0 | 0 | 0 | 14 |
|                             | Exercise | 2 | 2 | 0 | 1 | 2 | 1 | 2 | 1 | 0 | 0 | 0 | 0 | 11 |
| Tunay et al.[42]<br>2003    | Adjunct  | 0 | 0 | 0 | 0 | 0 | 0 | 0 | 1 | 0 | 0 | 0 | 0 | 1  |
|                             | Exercise | 0 | 0 | 0 | 0 | 0 | 2 | 2 | 1 | 0 | 0 | 0 | 0 | 5  |
| Akarcali et al.[43]<br>2002 | Adjunct  | 2 | 0 | 1 | 1 | 0 | 0 | 0 | 2 | 2 | 0 | 0 | 0 | 8  |
|                             | Exercise | 0 | 0 | 1 | 1 | 0 | 0 | 0 | 1 | 2 | 0 | 0 | 0 | 5  |
| Clark et al.[44]<br>2000    | Adjunct  | 0 | 1 | 0 | 2 | 2 | 2 | 0 | 2 | 2 | 0 | 0 | 0 | 11 |
|                             | Exercise | 0 | 1 | 2 | 1 | 2 | 1 | 0 | 1 | 0 | 0 | 2 | 0 | 10 |
| Eng et al.[45]<br>1993      | Adjunct  | 2 | 2 | 2 | 2 | 2 | 2 | 2 | 2 | 0 | 0 | 0 | 0 | 16 |
|                             | Exercise | 0 | 0 | 2 | 2 | 0 | 1 | 2 | 2 | 0 | 0 | 2 | 0 | 11 |

Note: 0=not reported; 1=partially reported; 2=adequately reported.  
The description of the interventions was rated as good ( $\geq 21/24$ ), moderate (18-20/24) or poor ( $\leq 17/24$ ).  
Criteria  
1. Brief name: provide the name or a phrase that described the intervention.  
2. Why: describe any rationale, theory, or goal of the elements essential to the intervention.  
3. What (materials): describe any physical or information materials used in the intervention, including those provided to participants or used in intervention delivery or in training of intervention providers; Provide information on where the materials can be accessed (e.g. online appendix, URL).

- 
4. What (procedures): describe each of the procedures, activities, and/or processes used in the intervention, including any enabling or support activities.
  5. Who provided: for each category of intervention provider (e.g. psychologist, nursing assistant), describe their expertise, background and any specific training given.
  6. How: describe the modes of delivery (such as face to face or by some other mechanism, such as internet or telephone) of the intervention and; whether it was provided individually or in a group.
  7. Where: describe the type(s) of location(s) where the intervention occurred, including any necessary infrastructure or relevant features.
  8. When and how much: describe the number of times the intervention was delivered and over what period of time including: the number of sessions; their schedule; their duration; intensity or dose.
  9. Tailoring: if the intervention was planned to be personalised, titrated or adapted, then describe what, why, when, and how.
  10. Modifications: if the intervention was modified during the course of the study, describe the changes (what, why, when, and how).
  11. How well (planned): if intervention adherence or fidelity was assessed, describe how and by whom, and if any strategies were used to maintain or improve fidelity, describe them.
  12. How well (actual): if intervention adherence or fidelity was assessed, describe the extent to which the intervention was delivered as planned.

## References

- 1 Jing W, Yingce Y, Xiaowei Y, *et al.* Intervention of muscle strength training combined with neuromuscular electrical stimulation on lower limb function and biomechanical changes in patients with patellofemoral pain. *CJTER*. 2024;28(9):1365-1371. doi:10.12307/2024.036.3.
- 2 Albornoz-Cabello M, Ibáñez-Vera AJ, Barrios-Quinta CJ, *et al.* Effects of Radiofrequency Diathermy Plus Therapeutic Exercises on Pain and Functionality of Patients with Patellofemoral Pain Syndrome: A Randomized Controlled Trial. *J Clin Med*. 2023;12:2348.
- 3 Lee JH, Rhim HC, Jang K-M. Effect of Adding Kinesio Taping to Exercise Therapy in the Treatment of Patellofemoral Pain Syndrome. *Medicina (Mex)*. 2023;59:754.
- 4 Mv VK, Subramanian NB, Sreelatha S, *et al.* Physiotherapeutic interventions on quadriceps muscle architecture in patello-femoral pain syndrome. *Bioinformation*. 2023;19:454–9.
- 5 Şahan TY, Vergili Ö, Oktaş B. Investigation of new application technique named star taping in patellofemoral pain: a randomized, single-blind, and placebo-controlled study. *Somatosens Mot Res*. 2023;1–8.

- 6 Songur A, Demirdel E, Kılıc O, *et al.* The effects of different taping methods on patellofemoral alignment, pain and function in individuals with patellofemoral pain: A randomized controlled trial. *PM R*. Published Online First: 29 August 2023. doi: 10.1002/pmrj.13067.
- 7 Anwar S, Javaid M, Malik S, *et al.* Effects of mulligan pain release phenomenon technique in management of patellofemoral pain syndrome: RCT. *Pak J Med Health Sci*. 2022;16:72–72. doi: 10.53350/pjmhs2216372.
- 8 Basbug P, Kilic RT, Atay AO, *et al.* The effects of progressive neuromuscular exercise program and taping on muscle strength and pain in patellofemoral pain. A randomized controlled blind study. *Somatosens Mot Res*. 2022;39:39–45.
- 9 Constantinou A, Mamais I, Papathanasiou G, *et al.* Comparing hip and knee focused exercises versus hip and knee focused exercises with the use of blood flow restriction training in adults with patellofemoral pain. *Eur J Phys Rehabil Med*. 2022;58:225–35.
- 10 Qayyum HA, Arsalan SA, Tanveer F, *et al.* Role of high power laser therapy on pain reduction in patients with patellofemoral pain syndrome. *Pak J Med Health Sci*. 2022;16:9–12.
- 11 Rodrigues GM, Paixão A, Arruda T, *et al.* Anodal transcranial direct current stimulation increases muscular strength and reduces pain perception in women with patellofemoral pain. *J Strength Cond Res*. 2022;36:371–8.
- 12 Wu Z, Zou Z, Zhong J, *et al.* Effects of whole-body vibration plus hip-knee muscle strengthening training on adult patellofemoral pain syndrome: a randomized controlled trial. *Disabil Rehabil*. 2022;44:6017–25.

- 13 Aghakeshizadeh F, Letafatkar A, Thomas AC. Internal and external focus show similar effect on the gait kinematics in patients with patellofemoral pain: A randomised controlled trial. *Gait Posture*. 2021;84:155–61.
- 14 Bagheri S, Naderi A, Mirali S, *et al*. Adding mindfulness practice to exercise therapy for female recreational runners with patellofemoral pain: a randomized controlled trial. *J Athl Train*. 2021;56:902–11.
- 15 Fatimah I, Waqqar S. Effects of tibiofemoral mobilization in patients of Patellofemoral pain syndrome. *JPMMA J Pak Med Assoc*. 2021;71:2506–10.
- 16 Albornoz-Cabello M, Ibáñez-Vera AJ, Aguilar-Ferrándiz ME, *et al*. Monopolar dielectric diathermy by emission of radiofrequency in Patellofemoral pain. A single-blind-randomized clinical trial. *Electromagn Biol Med*. 2020;39:282–9.
- 17 Arrebola LS, Teixeira de Carvalho R, Lam Wun PY, *et al*. Investigation of different application techniques for Kinesio Taping® with an accompanying exercise protocol for improvement of pain and functionality in patients with patellofemoral pain syndrome: A pilot study. *J Bodyw Mov Ther*. 2020;24:47–55.
- 18 Celik D, Argut SK, Türker N, *et al*. The effectiveness of superimposed neuromuscular electrical stimulation combined with strengthening exercises on patellofemoral pain: A randomized controlled pilot trial. *J Back Musculoskelet Rehabil*. 2020;33:693–9.
- 19 Ma Y-T, Li L-H, Han Q, *et al*. Effects of trigger point dry needling on neuromuscular performance and pain of individuals affected by patellofemoral pain: a randomized controlled trial. *J Pain Res*. 2020;13:1677–86.
- 20 Rasti E, Rojhani-Shirazi Z, Ebrahimi N, *et al*. Effects of whole body vibration with exercise therapy versus exercise therapy alone on flexibility, vertical jump height, agility and pain in athletes with patellofemoral pain: a randomized clinical trial. *BMC Musculoskelet Disord*. 2020;21:705.

- 21 Talbot LA, Solomon Z, Webb L, *et al.* Electrical Stimulation Therapies for Active Duty Military with Patellofemoral Pain Syndrome: A Randomized Trial. *Mil Med.* 2020;185:e963–71.
- 22 Zarei H, Bervis S, Piroozi S, *et al.* Added value of gluteus medius and quadratus lumborum dry needling in improving knee pain and function in female athletes with patellofemoral pain syndrome: a randomized clinical trial. *Arch Phys Med Rehabil.* 2020;101:265–74.
- 23 Yañez-Álvarez A, Bermúdez-Pulgarín B, Hernández-Sánchez S, *et al.* Effects of exercise combined with whole body vibration in patients with patellofemoral pain syndrome: a randomised-controlled clinical trial. *BMC Musculoskelet Disord.* 2020;21:582.
- 24 Glaviano NR, Marshall AN, Mangum LC, *et al.* Impairment-based rehabilitation with patterned electrical neuromuscular stimulation and lower extremity function in individuals with patellofemoral pain: a preliminary study. *J Athl Train.* 2019;54:255–69.
- 25 Nouri F, Raeissadat SA, Eliaspour D, *et al.* Efficacy of high-power laser in alleviating pain and improving function of patients with patellofemoral pain syndrome: a single-blind randomized controlled trial. *J Lasers Med Sci.* 2019;10:37–43.
- 26 Corum M, Basoglu C, Yakal S, *et al.* Effects of whole body vibration training on isokinetic muscular performance, pain, function, and quality of life in female patients with patellofemoral pain: a randomized controlled trial. *J Musculoskelet Neuronal Interact.* 2018;18:473–84.
- 27 Ghourbanpour A, Talebi GA, Hosseinzadeh S, *et al.* Effects of patellar taping on knee pain, functional disability, and patellar alignments in patients with patellofemoral pain syndrome: A randomized clinical trial. *J Bodyw Mov Ther.* 2018;22:493–7.

- 28 Sutlive TG, Golden A, King K, *et al.* Short-term effects of trigger point dry needling on pain and disability in subjects with patellofemoral pain syndrome. *Int J Sports Phys Ther.* 2018;13:462–73.
- 29 Giles L, Webster KE, McClelland J, *et al.* Quadriceps strengthening with and without blood flow restriction in the treatment of patellofemoral pain: a double-blind randomised trial. *Br J Sports Med.* 2017;51:1688–94.
- 30 Günay E, Sarıkaya S, Özdolap Ş, *et al.* Effectiveness of the kinesiotaping in the patellofemoral pain syndrome. *Turk J Phys Med Rehabil.* 2017;63:299–306.
- 31 Iammarrone CS, Cadossi M, Sambri A, *et al.* Is there a role of pulsed electromagnetic fields in management of patellofemoral pain syndrome? Randomized controlled study at one year follow-up. *Bioelectromagnetics.* 2016;37:81–8.
- 32 Petersen W, Ellermann A, Rembitzki IV, *et al.* Evaluating the potential synergistic benefit of a realignment brace on patients receiving exercise therapy for patellofemoral pain syndrome: a randomized clinical trial. *Arch Orthop Trauma Surg.* 2016;136:975–82.
- 33 Telles G, Cristovão DR, Belache FATC, *et al.* The effect of adding myofascial techniques to an exercise programme for patients with anterior knee pain. *J Bodyw Mov Ther.* 2016;20:844–50.
- 34 Akbaş E, Atay AO, Yüksel I. The effects of additional kinesio taping over exercise in the treatment of patellofemoral pain syndrome. *Acta Orthop Traumatol Turc.* 2011;45:335–41.
- 35 Mousavi SM, Khayambashi K, Nejadian SL, *et al.* The Effects of Kinesiotape and Strength Training on Knee Pain and Quadriceps Strength in People with Patellofemoral Pain Syndrome (PFPS). *J Isfahan Med Sch.* 2011;29:1657–68.



- 36 Bily W, Trimmel L, Mödlin M, *et al.* Training program and additional electric muscle stimulation for patellofemoral pain syndrome: a pilot study. *Arch Phys Med Rehabil.* 2008;89:1230–6.
- 37 Qi Z, Ng GYF. EMG analysis of vastus medialis obliquus/vastus lateralis activities in subjects with patellofemoral pain syndrome before and after a home exercise program. *J Phys Ther Sci.* 2007;19:131–7.
- 38 Denton J, Willson JD, Ballantyne BT, *et al.* The addition of the Protonics brace system to a rehabilitation protocol to address patellofemoral joint syndrome. *J Orthop Sports Phys Ther.* 2005;35:210–9.
- 39 Lun VMY, Wiley JP, Meeuwisse WH, *et al.* Effectiveness of patellar bracing for treatment of patellofemoral pain syndrome. *Clin J Sport Med.* 2005;15:235–40.
- 40 Whittingham M, Palmer S, Macmillan F. Effects of taping on pain and function in patellofemoral pain syndrome: a randomized controlled trial. *J Orthop Sports Phys Ther.* 2004;34:504–10.
- 41 Dursun N, Dursun E, Kiliç Z. Electromyographic biofeedback-controlled exercise versus conservative care for patellofemoral pain syndrome. *Arch Phys Med Rehabil.* 2001;82:1692–5.
- 42 Tunay VB, Baltacı G, Tunay S, *et al.* A comparison of different treatment approaches to patellofemoral pain syndrome. *The Pain Clinic.* 2003;15:179–84.
- 43 Akarcalı I, Tugay N, Kaya D, *et al.* The role of high voltage electrical stimulation in the rehabilitation of patellofemoral pain. *Pain Clin.* 2002;14:207–12.
- 44 Clark DI, Downing N, Mitchell J, *et al.* Physiotherapy for anterior knee pain: a randomised controlled trial. *Ann Rheum Dis.* 2000;59:700–4.
- 45 Eng JJ, Pierrynowski MR. Evaluation of soft foot orthotics in the treatment of patellofemoral pain syndrome. *Phys Ther.* 1993;73:62–8; discussion 68–70.
